# Supplementary material
Source: PubMed Central journal article supplement (PMC8901908)
Supplement: 41418_2021_882_MOESM9_ESM.pdf [file 41418_2021_882_MOESM9_ESM.pdf]

| <b>Gene Name</b> | <b>p53 fold change screen (IF)</b> |      |      | <b>p53 fold change validation (IB)</b> |       |
|------------------|------------------------------------|------|------|----------------------------------------|-------|
| BYSL             | 0.94                               | 2.18 | 4.53 | 5.36                                   | 2.76  |
| DDX18            | 2.21                               | 3.03 | 3.35 | 1.72                                   | 8.75  |
| DDX56            | 2.04                               | 2.15 | 2.47 | 6.31                                   | 4.86  |
| RPL23            | 2.31                               | 2.64 | 2.92 | 15.90                                  | 16.46 |
| UTP15            | 2.15                               | 2.52 | 4.80 | 8.37                                   | 16.70 |
| WDR43            | 1.79                               | 2.37 | 3.05 | 20.48                                  | 20.38 |
| WDR75            | 3.59                               | 3.76 | 3.95 | 2.55                                   | 3.12  |
