# Supplementary material
Source: PubMed Central journal article supplement (PMC8901908)
Supplement: 41418_2021_882_MOESM10_ESM.pdf [file 41418_2021_882_MOESM10_ESM.pdf]

| RP                                          | Moudry <i>et al.</i> |             |             | Nicolas <i>et al.</i> 2016                   |           |
|---------------------------------------------|----------------------|-------------|-------------|----------------------------------------------|-----------|
|                                             | p53 score 1          | p53 score 2 | p53 score 3 | RP                                           | p53 score |
| GNB211                                      | 0.98                 | 1.10        | 1.20        | RACK1                                        | 0.6       |
| RPL10                                       | 0.88                 | 0.88        | 2.14        | uL16 (RpL10)                                 | 2.5       |
| RPL10A                                      | 1.17                 | 1.52        | 1.57        | uL1 (RpL10a)                                 | 7.2       |
| RPL11                                       | 0.47                 | 0.49        | 0.72        | uL5 (RpL11)                                  | 1.0       |
| RPL12                                       | 0.74                 | 0.76        | 1.10        | uL11 (RpL12)                                 | 3.3       |
| RPL13                                       | 1.34                 | 2.22        | 3.07        | eL13 (RpL13)                                 | 8.0       |
| RPL13A                                      | 1.21                 | 2.10        | 2.35        | uL13 (RpL13a)                                | 8.5       |
| RPL14                                       | 1.89                 | 2.27        | 2.33        | eL14 (RpL14)                                 | 10.0      |
| RPL15                                       | 0.94                 | 0.95        | 2.64        | eL15 (RpL15)                                 | 1.1       |
| RPL17                                       | 1.62                 | 1.70        | 1.71        | uL22 (RpL17)                                 | 8.2       |
| RPL18                                       | 1.74                 | 2.25        | 3.31        | eL18 (RpL18)                                 | 3.5       |
| RPL18A                                      | 1.99                 | 2.09        | 2.24        | eL20 (RpL18a)                                | 6.2       |
| RPL19                                       | 1.72                 | 1.76        | 3.04        | eL19 (RpL19)                                 | 5.4       |
| RPL21                                       | 1.58                 | 1.80        | 2.13        | eL21 (RpL21)                                 | 8.3       |
| RPL22                                       | 0.71                 | 0.71        | 0.71        | eL22 (RpL22)                                 | 0.5       |
| RPL23                                       | 2.31                 | 2.64        | 2.92        | uL14 (RpL23)                                 | 2.2       |
| RPL23A                                      | 0.82                 | 1.26        | 1.30        | uL23 (RpL23a)                                | 0.7       |
| RPL24                                       | 0.52                 | 0.76        | 0.85        | eL24 (RpL24)                                 | 2.2       |
| RPL26                                       | 1.67                 | 1.89        | 2.33        | uL24 (RpL26)                                 | 1.8       |
| RPL27                                       | 1.79                 | 1.83        | 1.90        | eL27 (RpL27)                                 | 6.3       |
| RPL27A                                      | 0.75                 | 0.93        | 0.98        | uL15 (RpL27a)                                | 5.2       |
| RPL28                                       | 0.97                 | 2.58        | 2.94        | eL28 (RpL28)                                 | 1.5       |
| RPL29                                       | 0.88                 | 1.17        | 1.40        | eL29 (RpL29)                                 | 1.0       |
| RPL3                                        | 1.85                 | 2.62        | 3.77        | uL3 (RpL3)                                   | 4.2       |
| RPL30                                       | 1.61                 | 1.74        | 1.86        | eL30 (RpL30)                                 | 5.7       |
| RPL31                                       | 1.01                 | 1.55        | 2.20        | eL31 (RpL31)                                 | 1.1       |
| RPL32                                       | 1.06                 | 2.45        | 2.73        | eL32 (RpL32)                                 | 4.8       |
| RPL34                                       | 1.83                 | 1.97        | 2.13        | eL34 (RpL34)                                 | 8.3       |
| RPL35                                       | 1.99                 | 2.22        | 2.28        | uL29 (RpL35)                                 | 5.0       |
| RPL35A                                      | 1.95                 | 2.30        | 4.07        | eL33 (RpL35a)                                | 8.9       |
| RPL36                                       | 2.17                 | 2.33        | 2.34        | eL36 (RpL36)                                 | 5.5       |
| RPL36A                                      | 0.97                 | 0.99        | 1.27        | eL42 (RpL36a)                                | 0.9       |
| RPL37                                       | 1.86                 | 2.09        | 3.64        | eL37 (RpL37)                                 | 6.9       |
| RPL37A                                      | 1.75                 | 1.80        | 1.81        | eL43 (RpL37a)                                | 5.7       |
| RPL38                                       | 1.49                 | 1.72        | 2.41        | eL38 (RpL38)                                 | 8.9       |
| RPL39                                       | 1.84                 | 1.92        | 2.55        | eL39 (RpL39)                                 | 10.4      |
| RPL4                                        | 2.17                 | 2.36        | 4.67        | uL4 (RpL4)                                   | 4.2       |
| RPL40                                       | 0.49                 | 0.62        | 1.67        | eL40 (RpL40)                                 | 3.2       |
| RPL41                                       | 0.93                 | 1.68        | 2.01        | eL41 (RpL41)                                 | 0.8       |
| RPL5                                        | 0.52                 | 0.52        | 0.64        | uL18 (RpL5)                                  | 1.9       |
| RPL6                                        | 2.09                 | 3.00        | 3.17        | eL6 (RpL6)                                   | 4.8       |
| RPL7                                        | 2.36                 | 2.75        | 3.09        | uL30 (RpL7)                                  | 5.1       |
| RPL8                                        | 1.99                 | 2.05        | 2.74        | uL2 (RpL8)                                   | 7.1       |
| RPL9                                        | 1.19                 | 2.18        | 2.38        | uL6 (RpL9)                                   | 6.3       |
| RPS10                                       | 0.87                 | 0.87        | 1.17        | eS10 (RpS10)                                 | 0.5       |
| RPS11                                       | 1.18                 | 1.34        | 1.36        | uS17 (RpS11)                                 | 2.0       |
| RPS12                                       | 0.84                 | 1.01        | 1.21        | eS12 (RpS12)                                 | 0.9       |
| RPS13                                       | 1.04                 | 1.12        | 1.51        | uS15 (RpS13)                                 | 0.9       |
| RPS14                                       | 0.92                 | 1.12        | 2.03        | uS11 (RpS14)                                 | 1.4       |
| RPS15                                       | 0.76                 | 0.89        | 1.23        | uS19 (RpS15)                                 | 0.9       |
| RPS15A                                      | 1.00                 | 1.09        | 1.34        | uS8 (RpS15a)                                 | 1.9       |
| RPS16                                       | 0.78                 | 0.88        | 1.14        | uS9 (RpS16)                                  | 1.4       |
| RPS17                                       | 0.61                 | 0.77        | 1.17        | eS17 (RpS17)                                 | 1.4       |
| RPS18                                       | 0.90                 | 1.47        | 1.63        | uS13 (RpS18)                                 | 1.7       |
| RPS19                                       | 1.19                 | 1.41        | 2.96        | eS19 (RpS19)                                 | 2.4       |
| RPS2                                        | 0.97                 | 1.02        | 1.13        | uS5 (RpS2)                                   | 1.1       |
| RPS20                                       | 0.97                 | 1.21        | 1.22        | uS10 (RpS20)                                 | 4.6       |
| RPS21                                       | 1.05                 | 1.18        | 1.25        | eS21 (RpS21)                                 | 2.9       |
| RPS23                                       | 0.86                 | 1.02        | 1.17        | uS12 (RpS23)                                 | 0.5       |
| RPS24                                       | 0.78                 | 0.79        | 1.11        | eS24 (RpS24)                                 | 0.5       |
| RPS25                                       | 0.76                 | 1.39        | 1.63        | eS25 (RpS25)                                 | 3.2       |
| RPS26                                       | 0.58                 | 0.94        | 1.21        | eS26 (RpS26)                                 | 1.8       |
| RPS27                                       | 1.19                 | 1.30        | 1.46        | eS27 (RpS27)                                 | 2.1       |
| RPS27A                                      | 0.69                 | 0.72        | 2.99        | eS31 (RpS27a)                                | 6.9       |
| RPS28                                       | 0.67                 | 0.78        | 1.29        | eS28 (RpS28)                                 | 1.5       |
| RPS29                                       | 0.85                 | 0.85        | 0.89        | uS14 (RpS29)                                 | 1.6       |
| RPS3                                        | 1.05                 | 1.15        | 1.37        | uS3 (RpS3)                                   | 1.3       |
| RPS30                                       | 0.71                 | 1.03        | 1.31        | eS30 (RpS30)                                 | 1.3       |
| RPS3A                                       | 0.78                 | 0.96        | 1.09        | eS1 (RpS3a)                                  | 0.8       |
| RPS4X                                       | 0.80                 | 0.81        | 1.27        | eS4 (RpS4)                                   | 1.1       |
| RPS4Y                                       | 1.42                 | 2.92        | 3.33        | not in library used by Nicolas <i>et al.</i> |           |
| RPS5                                        | 0.93                 | 1.06        | 1.18        | uS7 (RpS5)                                   | 0.8       |
| RPS6                                        | 0.64                 | 0.82        | 1.37        | eS6 (RpS6)                                   | 0.6       |
| RPS7                                        | 1.19                 | 1.21        | 1.48        | eS7 (RpS7)                                   | 0.8       |
| RPS8                                        | 1.10                 | 1.11        | 1.24        | eS8 (RpS8)                                   | 1.0       |
| RPS9                                        | 0.74                 | 0.75        | 2.04        | uS4 (RpS9)                                   | 2.2       |
| RPSA                                        | 0.99                 | 1.19        | 1.30        | uS2 (RpSA)                                   | 1.0       |
| not in library used by Moudry <i>et al.</i> |                      |             |             | eS27L (RpS27L)                               | 1.3       |
| not in library used by Moudry <i>et al.</i> |                      |             |             | eL8 (RpL7a)                                  | 7.2       |
| not in library used by Moudry <i>et al.</i> |                      |             |             | uL10 (P0)                                    | 1.7       |
| not in library used by Moudry <i>et al.</i> |                      |             |             | P1                                           | 2.1       |
| not in library used by Moudry <i>et al.</i> |                      |             |             | P2                                           | 1.1       |

| Number of primary RP hits                     |       |
|-----------------------------------------------|-------|
| Moudry <i>et al.</i>                          | 19    |
| Scored in screen by Nicolas <i>et al.</i>     | 11    |
| Not scored in screen by Nicolas <i>et al.</i> | 8     |
|                                               | RPL3  |
|                                               | RPL4  |
|                                               | RPL18 |
|                                               | RPL23 |
|                                               | RPL28 |
|                                               | RPL32 |
|                                               | RPL4Y |
|                                               | RPS20 |

validated by Moudry *et al.*  
not in library used by Nicolas *et al.*
